# Supplementary material for: Virulence, Antibiotic Resistance, and Phylogenetic Relationships of Aeromonas spp. Carried by Migratory Birds in China
Source: MDPI journal article supplement (doi:10.3390/microorganisms11010007), 2022-12-20
Supplement: s1 [file s1]

## *Supplementary Material*

# **Phylogenetic characteristics, virulence and antibiotic resistant of *Aeromonas* spp. carried by migratory birds in China**

**Bing Liang<sup>1,2,\*</sup>, Xue Ji<sup>1,2,†</sup>, Bo-wen Jiang<sup>1,2</sup>, Tingyu Yuan<sup>3</sup>, Chao Lu Men Gerile<sup>4</sup>, Lingwei Zhu<sup>1,2</sup>, Tiecheng Wang<sup>1,2</sup>, Yuanguo Li<sup>1,2</sup>, Jun Liu<sup>1,2</sup>, Xuejun Guo<sup>1,2</sup> and Yang Sun<sup>1,2,3\*</sup>**

<sup>1</sup> Changchun Veterinary Research Institute, Chinese Academy of Agricultural Sciences, Changchun, Jilin, China

<sup>2</sup> Key Laboratory of Jilin Province for Zoonosis Prevention and Control, Changchun, Jilin, China

<sup>3</sup> Ruminant Diseases Research Center, College of Life Sciences, Shandong Normal University, Jinan, China.

<sup>4</sup> Center for Animal Disease Control and Prevention of Yi Jin Huo Luo Banner, Ordos, China

\* Correspondence: bing897933468@163.com (B.L.); sunyang10@hotmail.com (Y.S.)

## **1 Supplementary Figures and Tables**

### **1.1 Supplementary Figures**

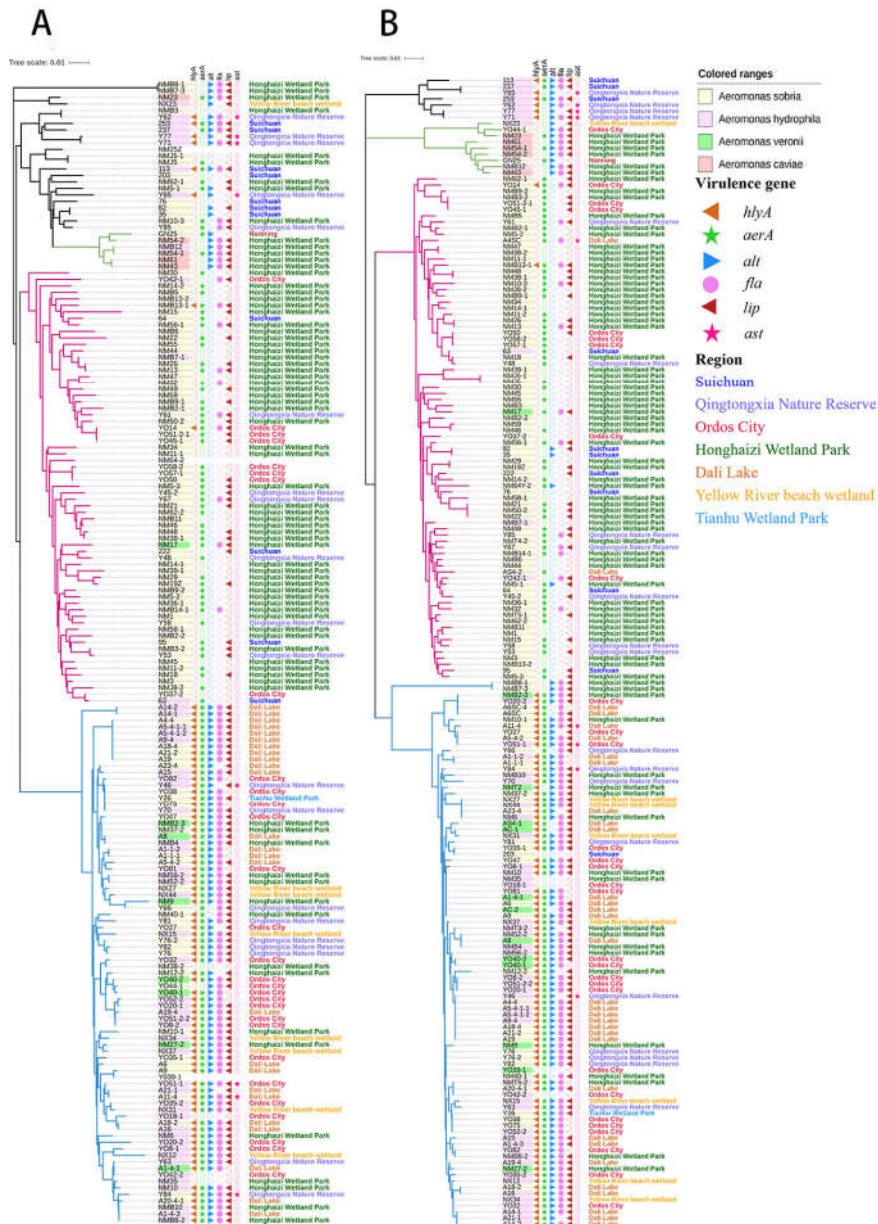

**Supplementary Figure S1.** Unrooted phylogenetic trees based on *recA* (A) and *metG* (B) gene sequences, showing relationships in the genus *Aeromonas* from migratory birds in this study. Note: A solid symbol shows that the strain contains virulence-associated genes; a hollow symbol shows that the strain did not contain virulence-associated genes. Colored rectangles represent the species of *Aeromonas*. For each strain, the shapes of different colors indicate the presence of the virulence factor genes analyzed in this study. The different color characters represent *Aeromonas* strains isolated from seven different regions in China.

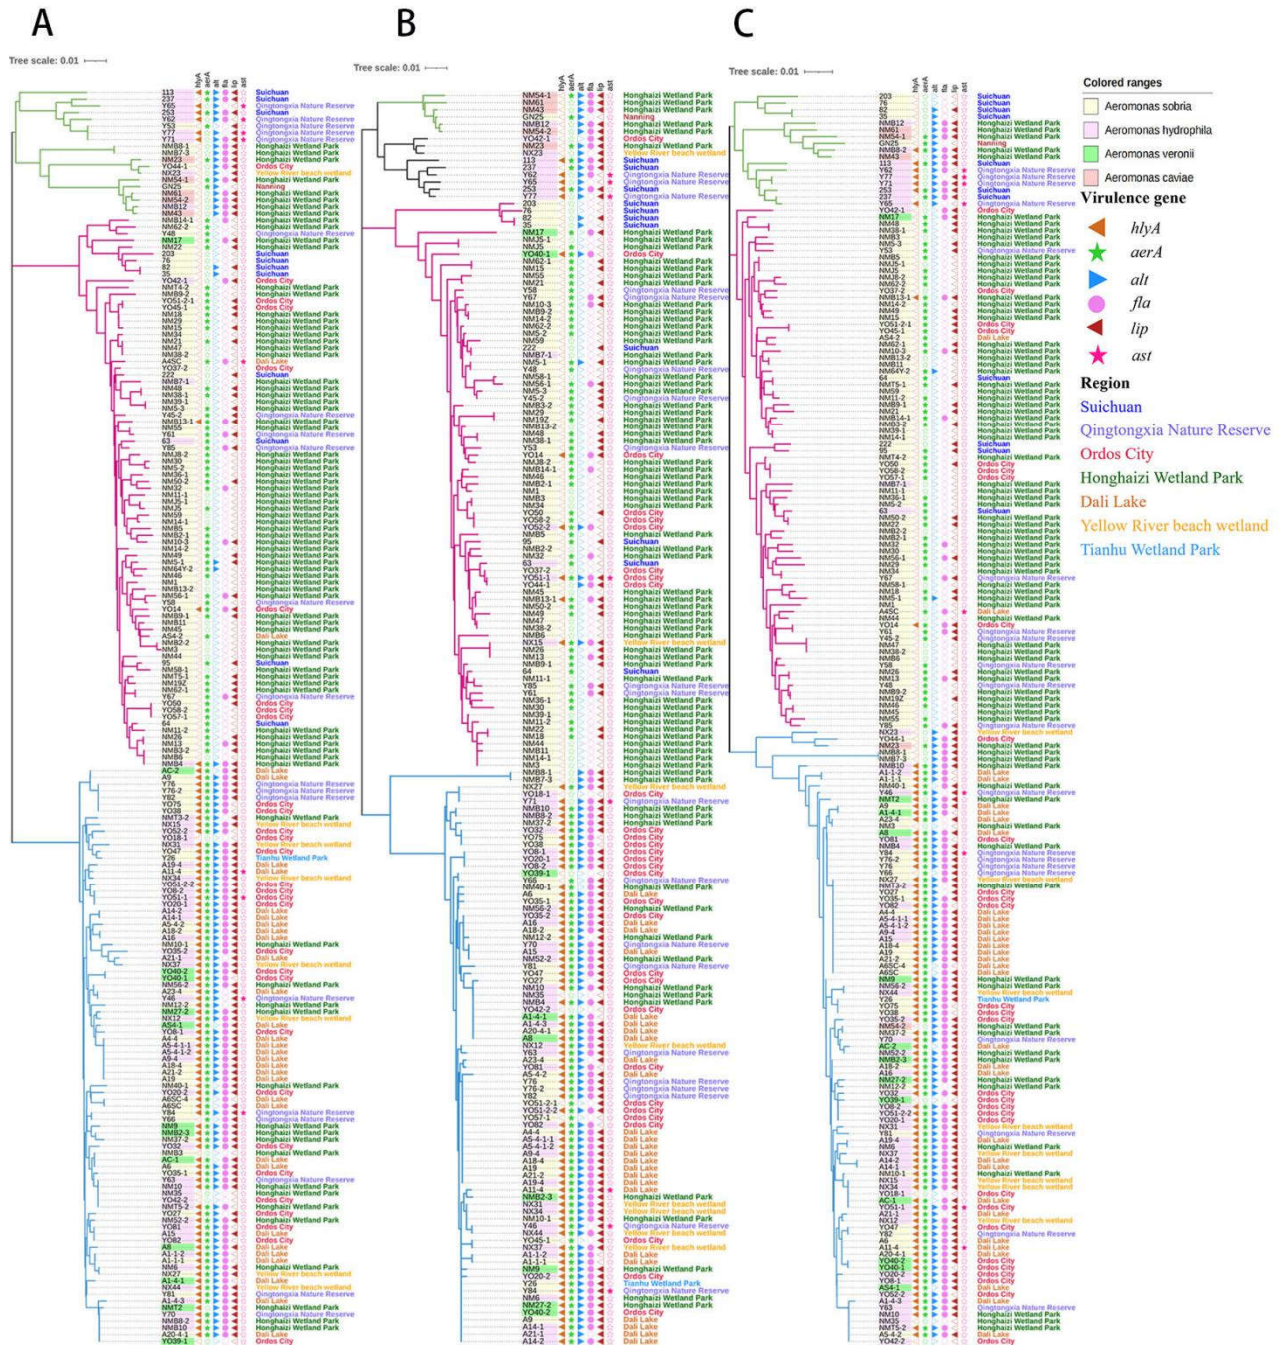

**Supplementary Figure S2.** Unrooted phylogenetic trees based on *groL* (A), *gltA* (B) and *gyrB* (C) gene sequences, showing relationships in the genus *Aeromonas* from migratory birds in this study. Note: A solid symbol shows that the strain contains virulence-associated genes; a hollow symbol shows that the strain did not contain virulence-associated genes. Colored rectangles represent the species of *Aeromonas*. For each strain, the shapes of different colors indicate the presence of the virulence factor genes analyzed in this study. The different color characters represent *Aeromonas* strains isolated from seven different regions in China.

## 1.2 Supplementary Table 1

**Supplementary Table S1.** 21 kinds of antibiotics in BD Phoenix TM-100 automatic microbial identification system

| Antimicrobial classification                                   | Antimicrobial agent                             |
|----------------------------------------------------------------|-------------------------------------------------|
| Aminoglycosides                                                | Amikacin<br>Gentamicin                          |
| Carbapenems                                                    | Imipenem<br>Meropenem                           |
| First and second generation cephalosporins                     | Cefazolin<br>Ceftazidime                        |
| Third and fourth generation cephalosporins                     | Cefotaxime<br>Cefepime                          |
| Monocyclic lactams                                             | Aztreonam                                       |
| Penicillins                                                    | Ampicillin<br>Piperacillin                      |
| Penicillins/ $\beta$ - Lactamase inhibitor complex             | Amoxicillin-Clavulanate<br>Ampicillin-Sulbactam |
| Pseudomonas Penicillins- $\beta$ - Lactamase inhibitor complex | Piperacillin-Tazobactam                         |
| Polymyxin                                                      | Colistin                                        |
| Sulfonamides                                                   | Trimethoprim-Sulfamethoxazole                   |
| Chloramphenicol                                                | Chloramphenicol                                 |
| Quinolones                                                     | Ciprofloxacin<br>Levofloxacin<br>Moxifloxacin   |
| Tetracyclines                                                  | Tetracycline                                    |

**Supplementary Table S2.** In vitro susceptibility of 176 *Aeromonas* isolates to 13 antimicrobial agents

| Antimicrobial agent           | Total<br>(176) | Ningxia<br>(29) | Jiangxi<br>(11) | Honghaizi<br>Wetland<br>Park<br>(80) | Ordos<br>City<br>(30) | Dali Lake<br>(25) | Nanning<br>(1) |
|-------------------------------|----------------|-----------------|-----------------|--------------------------------------|-----------------------|-------------------|----------------|
| Gentamicin                    | 8.0%(14)       | 31.0%(9)        | 9.1%(1)         | 1.3%(1)                              | 6.7%(2)               | 4.0%(1)           | —              |
| Cefazolin <sup>a</sup>        | 39.2%(69)      | 69.0%(20)       | 36.4%(4)        | 21.3%(17)                            | 33.3%(0)              | 68.0%(17)         | 100.0%(1)      |
| Ceftazidime                   | 0.6%(1)        | —               | 9.1%(1)         | —                                    | —                     | —                 | —              |
| Cefotaxime                    | 8.0%(14)       | 48.3%(14)       | —               | —                                    | —                     | —                 | —              |
| Cefepime                      | 2.3%(4)        | 13.8%(4)        | —               | —                                    | —                     | —                 | —              |
| Aztreonam                     | 2.3%(4)        | 13.8%(4)        | —               | —                                    | —                     | —                 | —              |
| Ampicillin                    | 97.7%(172)     | 100.0%(29)      | 100.0%(1)       | 98.8%(79)                            | 93.3%(28)             | 96.0%(24)         | 100.0%(1)      |
| Piperacillin                  | 13.6%(24)      | 58.6%(17)       | 27.3%(3)        | 2.5%(2)                              | 6.7%(2)               | 0.0%(0)           | —              |
| Amoxicillin-Clavulanate       | 2.8%(5)        | —               | —               | —                                    | 3.3%(1)               | 16.0%(4)          | —              |
| Ampicillin-Sulbactam          | 89.8%(158)     | 89.7%(26)       | 100.0%(1)       | 95.0%(76)                            | 76.7%(23)             | 84.0%(21)         | 100.0%(1)      |
| Piperacillin-Tazobactam       | 2.8%(5)        | —               | 18.2%(2)        | 2.5%(2)                              | 3.3%(1)               | —                 | —              |
| Colistin <sup>b</sup>         | 13.1%(23)      | 6.95%(2)        | 27.3%(3)        | 6.3%(5)                              | 16.7%(5)              | 32.0%(8)          | —              |
| Trimethoprim-Sulfamethoxazole | 11.4%(20)      | 58.6%(17)       | —               | 2.5%(2)                              | 3.3%(1)               | —                 | —              |
| Chloramphenicol               | 10.2%(18)      | 58.6%(17)       | 9.1%(1)         | —                                    | —                     | —                 | —              |
| Ciprofloxacin                 | 4.0%(7)        | 20.7%(6)        | —               | —                                    | 3.3%(1)               | —                 | —              |
| Tetracycline                  | 14.8%(26)      | 58.6%(17)       | —               | 2.5%(2)                              | 20.0%(6)              | —                 | 100.0%(1)      |

<sup>a</sup> Refer to MIC standards for *Vibrio*

<sup>b</sup> Refer to EUCAST standards for *Enterobacter*.

*Moxifloxacin* was not analyzed statistically separately.

Note: Univariate ANOVA revealed that the difference between groups was highly significant for each antibiotic. Other pairwise comparisons within each group were significant. It was observed that isolates were susceptible to amikacin, imipenem, meropenem, and levofloxacin. Reference standards were not used for drug resistance of *Aeromonas* to mupirocin.

**Supplementary Table S3.** Antibiotic susceptibility test (AST) typing of *Aeromonas* spp.

| The geographical position    | AST profile  | Phonotypic typing profile | Number of strain | MAR index |
|------------------------------|--------------|---------------------------|------------------|-----------|
| the north(53)                | 001000000000 | C                         | 7                | 0.08      |
|                              | 001001010000 | D                         | 9                | 0.25      |
|                              | 101101001111 | G                         | 5                | 0.67      |
|                              | 000000000000 | H                         | 3                | 0         |
|                              | 000001000001 | I                         | 3                | 0.17      |
|                              | 001001001101 | K                         | 4                | 0.42      |
|                              | 001101001101 | L                         | 2                | 0.50      |
|                              | 001111001101 | M                         | 2                | 0.58      |
|                              | 100001000000 | N                         | 2                | 0.17      |
|                              | 100001010000 | O                         | 2                | 0.25      |
|                              | 000000000001 | P                         | 1                | 0.08      |
|                              | 000000010000 | Q                         | 1                | 0.08      |
|                              | 000000011000 | R                         | 1                | 0.17      |
|                              | 000001011000 | S                         | 1                | 0.25      |
|                              | 001001000010 | T                         | 1                | 0.25      |
|                              | 001001001000 | U                         | 1                | 0.25      |
|                              | 001001110000 | W                         | 1                | 0.33      |
|                              | 001101000000 | X                         | 1                | 0.25      |
|                              | 001110001101 | Y                         | 1                | 0.50      |
|                              | 001110011101 | Z                         | 1                | 0.58      |
|                              | 100000000000 | AA                        | 1                | 0.08      |
|                              | 101001010000 | AB                        | 1                | 0.33      |
|                              | 101100001111 | AC                        | 1                | 0.58      |
| The south(2)                 | 101101001101 | AD                        | 1                | 0.58      |
|                              | 001001010100 | V                         | 1                | 0.33      |
|                              | 101101110000 | AE                        | 1                | 0.50      |
| the north(111)&The south(10) | 000001000000 | A                         | 79&5             | 0.08      |
|                              | 001001000000 | B                         | 22&2             | 0.17      |
|                              | 000001010000 | E                         | 4&1              | 0.17      |
|                              | 001001000001 | F                         | 4&1              | 0.25      |
|                              | 000001100000 | J                         | 2&1              | 0.17      |

Note: The order of AST profile is Aminoglycosides, Carbapenems, First and second generation cephalosporins, Third and fourth generation cephalosporins, Monocyclic lactams, Penicillins, Penicillins/  $\beta$  - Lactamase inhibitor complex, Pseudomonas Penicillins-  $\beta$  - Lactamase inhibitor complex, Polymyxin, Sulfonamides, Chloramphenicol, Quinolones and Tetracyclines. 0: sensitive; 1: drug resistant

**Supplementary Table S4.** Genetic detection of six virulence genes in *Aeromonas* spp.

| Target gene | Total (176) | Statistics by Region |             |               |                             |                 |                |                |                 | Statistics by <i>Aeromonas</i> species |                        |                       |                      |
|-------------|-------------|----------------------|-------------|---------------|-----------------------------|-----------------|----------------|----------------|-----------------|----------------------------------------|------------------------|-----------------------|----------------------|
|             |             | Ningxia (29)         | Nanning (1) | Suichuan (11) | Honghaizi Wetland Park (80) | Ordos City (30) | Dali Lake (25) | The south (12) | The north (164) | <i>A. hydrophila</i> (53)              | <i>A. sobria</i> (109) | <i>A. veronii</i> (9) | <i>A. caviae</i> (5) |
| <i>hlyA</i> | 46.0%(81)   | 69.0%(20)            | —           | 18.2%(2)      | 22.5%(18)                   | 63.3%(19)       | 93.8%(37)      | 16.7%(2)       | 48.2%(79)       | 83.0%(44)                              | 27.5%(30)              | 77.8%(7)              | —                    |
| <i>aerA</i> | 76.1%(134)  | 82.8%(24)            | 100.0%(1)   | 54.5%(6)      | 73.8%(59)                   | 80.0%(24)       | 100%(83)       | 58.3%(7)       | 77.4%(127)      | 79.2%(42)                              | 75.2%(82)              | 88.9%(8)              | 40.0%(2)             |
| <i>alt</i>  | 52.3%(92)   | 72.4%(21)            | 100.0%(1)   | 45.5%(5)      | 32.5%(26)                   | 63.3%(19)       | 78.1%(45)      | 50.0%(6)       | 52.4%(86)       | 88.7%(47)                              | 31.2%(34)              | 77.8%(7)              | 100.0%(5)            |
| <i>fla</i>  | 54.0%(95)   | 72.4%(21)            | —           | 27.3%(3)      | 37.5%(30)                   | 66.7%(20)       | 90.6%(50)      | 25.0%(3)       | 56.1%(92)       | 81.1%(43)                              | 35.8%(39)              | 88.9%(8)              | 100.0%(5)            |
| <i>lip</i>  | 64.2%(113)  | 86.2%(25)            | —           | 54.5%(6)      | 56.3%(45)                   | 60%(18)         | 81.3%(63)      | 50.0%(6)       | 65.2%(107)      | 79.2%(42)                              | 55.0%(60)              | 66.7%(6)              | 100.0%(5)            |
| <i>ast</i>  | 4.5%(8)     | 20.7%(6)             | —           | —             | —                           | 3.3%(1)         | 6.3%(1)        | —              | 4.9%(8)         | 11.3%(6)                               | 1.8%(2)                | —                     | —                    |

Note: Univariate ANOVA revealed that the difference between groups was highly significant for each antibiotic. Other pairwise comparisons within each group were significant.
